# Supplementary material
Source: publisher figshare collection journal article supplement (https://karger.figshare.com/articles/dataset/_/7306715)
Supplement: Supplementary file 1 [file 1]

## Suppl. Appendix: Online Survey

### Title: Usefulness of the Mobile Teledermoscopy Phone App – For Consumers

#### Section 1: Skin Self-Examination

1. Do you conduct regular skin self-examinations?

☐ Yes

☐ No

Why or why not?

---

#### Section 2: Mobile Teledermoscopy

Mobile teledermoscopy is a new way of looking at moles or skin spots. Teledermoscopy uses a device called a dermatoscope to magnify moles and spots. This allows a doctor to get a better look at the shape, colour and structure within the mole or spot. Mobile teledermoscopy (see figure below) is a process that uses a smartphone to:

- attach to a custom dermatoscope that allows you to look at moles and skin spots;
- photograph moles or spots magnified with the dermatoscope camera;
- e-mail the photograph to a dermatologist, and
- receive feedback from the dermatologist about the mole or spot.

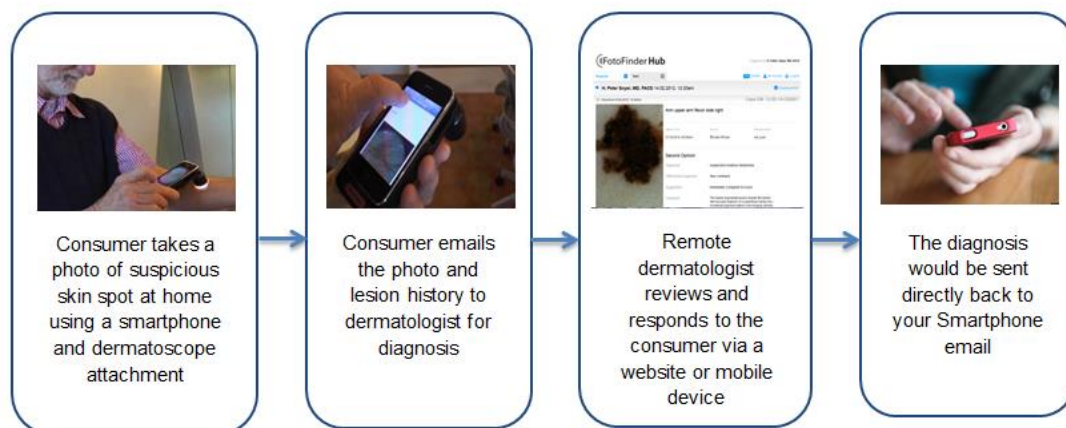

2. Have you used mobile teledermoscopy before?

☐ Yes (go to question 4)

☐ No

☐ Unsure

3. If you have not used mobile teledermoscopy before, would you consider sending photos of moles to a doctor?

☐ Yes

☐ No

Why or why not?

---

### Section 3: App Design

Watch the 1-min video below to view how to use the mobile teledermoscopy app. The app is designed to assist in taking, storing and e-mailing photos for diagnosis.

4. In your opinion, what are the benefits of using this app?  
\_\_\_\_\_
5. In your opinion, what are the disadvantages of using this app?  
\_\_\_\_\_
6. Are there any features missing in the handyscope app you would like to see added?  
\_\_\_\_\_
7. Can you suggest any other improvements you would like to see within the app?  
\_\_\_\_\_

### Section 4: Providing Results

The photos you submit in this app would be reviewed by a doctor and relayed back to you.

8. How would you like the results relayed back to you?
  - ☐ Phone
  - ☐ E-mail
  - ☐ Via a notification in the app
  - ☐ Your general practitioner
  - ☐ Other (please specify)  
\_\_\_\_\_
9. What is an acceptable time frame from sending the photos to receiving the result?  
\_\_\_\_\_

### Section 5: Privacy and Confidentiality

10. All data in the app are kept secure and encrypted and can be password protected. However, when sending photos via the app, would you be concerned about privacy and confidentiality?

- ☐ Yes
- ☐ No

Why or why not?  
\_\_\_\_\_

### Section 6: Demographics

For this section of the questionnaire, we would like to ask a few questions about yourself.

11. What is your gender?
  - ☐ Male
  - ☐ Female
12. How old are you? \_\_\_\_\_

13. Have you ever had melanoma removed before (including squamous cell carcinoma, basal cell carcinoma and melanoma)?

- ☐ Yes
- ☐ No
- ☐ Unsure
